# Supplementary material
Source: PubMed Central journal article supplement (PMC8115940)
Supplement: mmc1.pdf [file mmc1.pdf]

# THE LANCET

## Supplementary appendix

This appendix formed part of the original submission. We post it as supplied by the authors.

**This online publication has been corrected. The corrected version first appeared at [thelancet.com](http://thelancet.com) on May 18, 2021.**

Supplement to: Shaw RH, Stuart A, Greenland M, et al. Heterologous prime-boost COVID-19 vaccination: initial reactogenicity data. *Lancet* 2021; published online May 12. [http://dx.doi.org/10.1016/S0140-6736\(21\)01115-6](http://dx.doi.org/10.1016/S0140-6736(21)01115-6).

Supplementary Figure 1: CONSORT flow diagram of participants

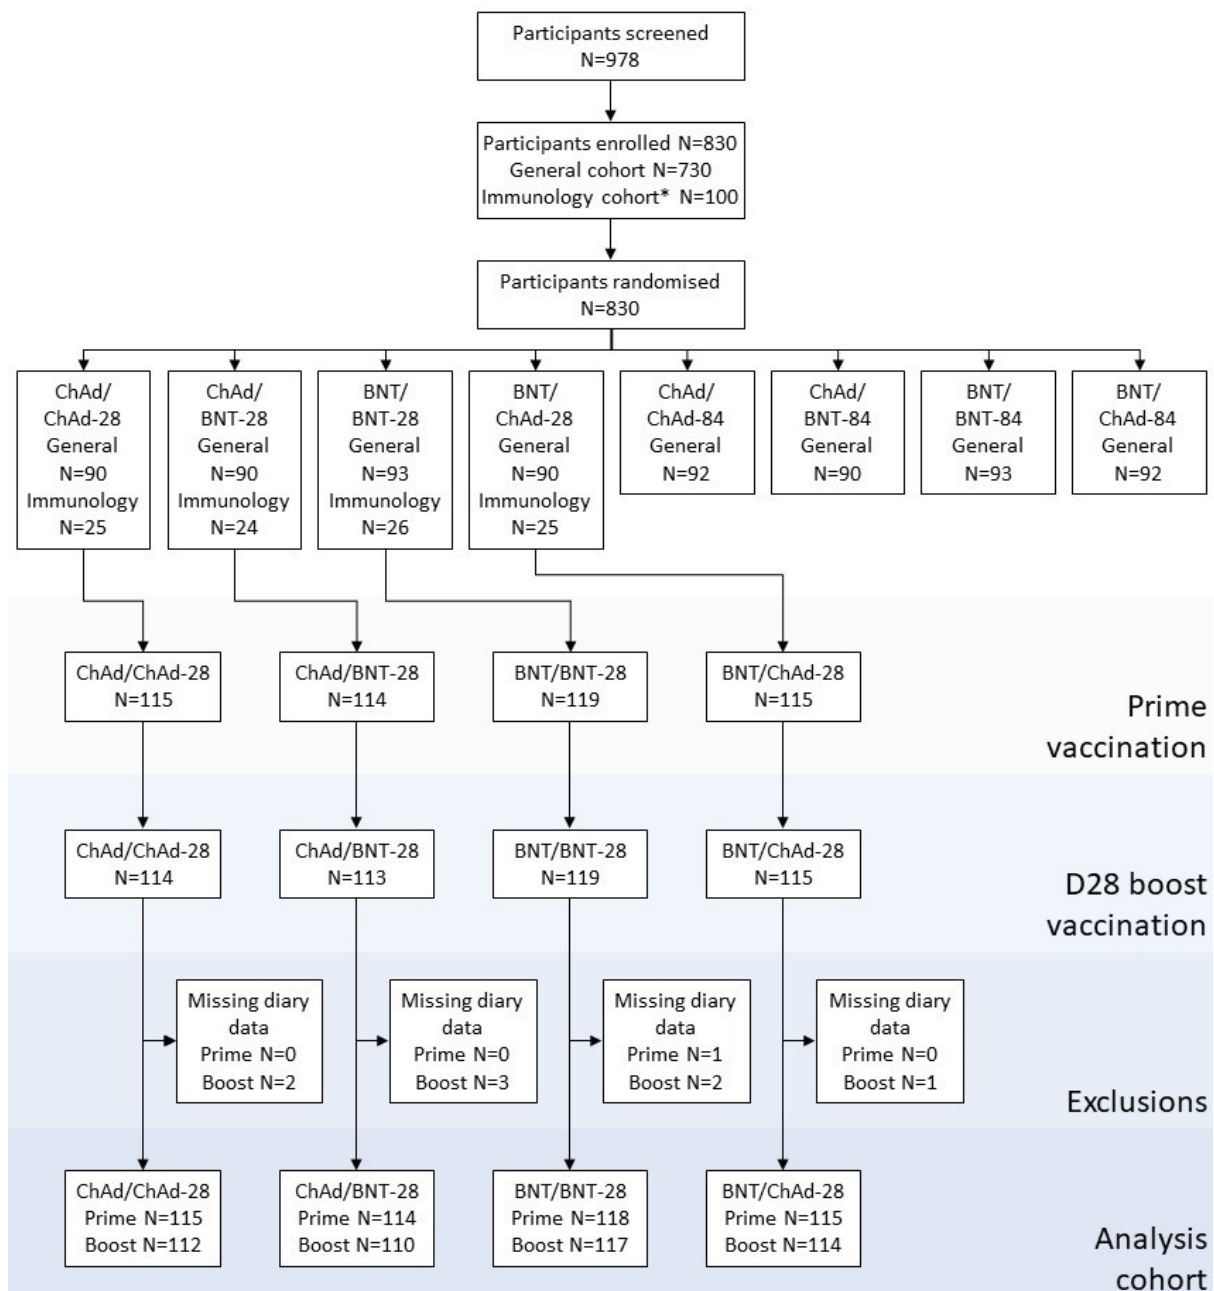

\* The immunology cohort was only randomised to the four arms with 28 days prime-boost interval.

Participants were recruited at eight sites: University College London Hospitals NHS Foundation Trust; St Georges University Hospitals NHS Foundation trust; University Hospitals Birmingham NHS Foundation Trust; North Bristol NHS trust; Oxford Vaccine Group, University of Oxford; The University of Nottingham Health Services; University Hospital Southampton NHS Foundation Trust and Liverpool School of Tropical Medicine.

1 *Supplementary Figure 2: Forest plot*

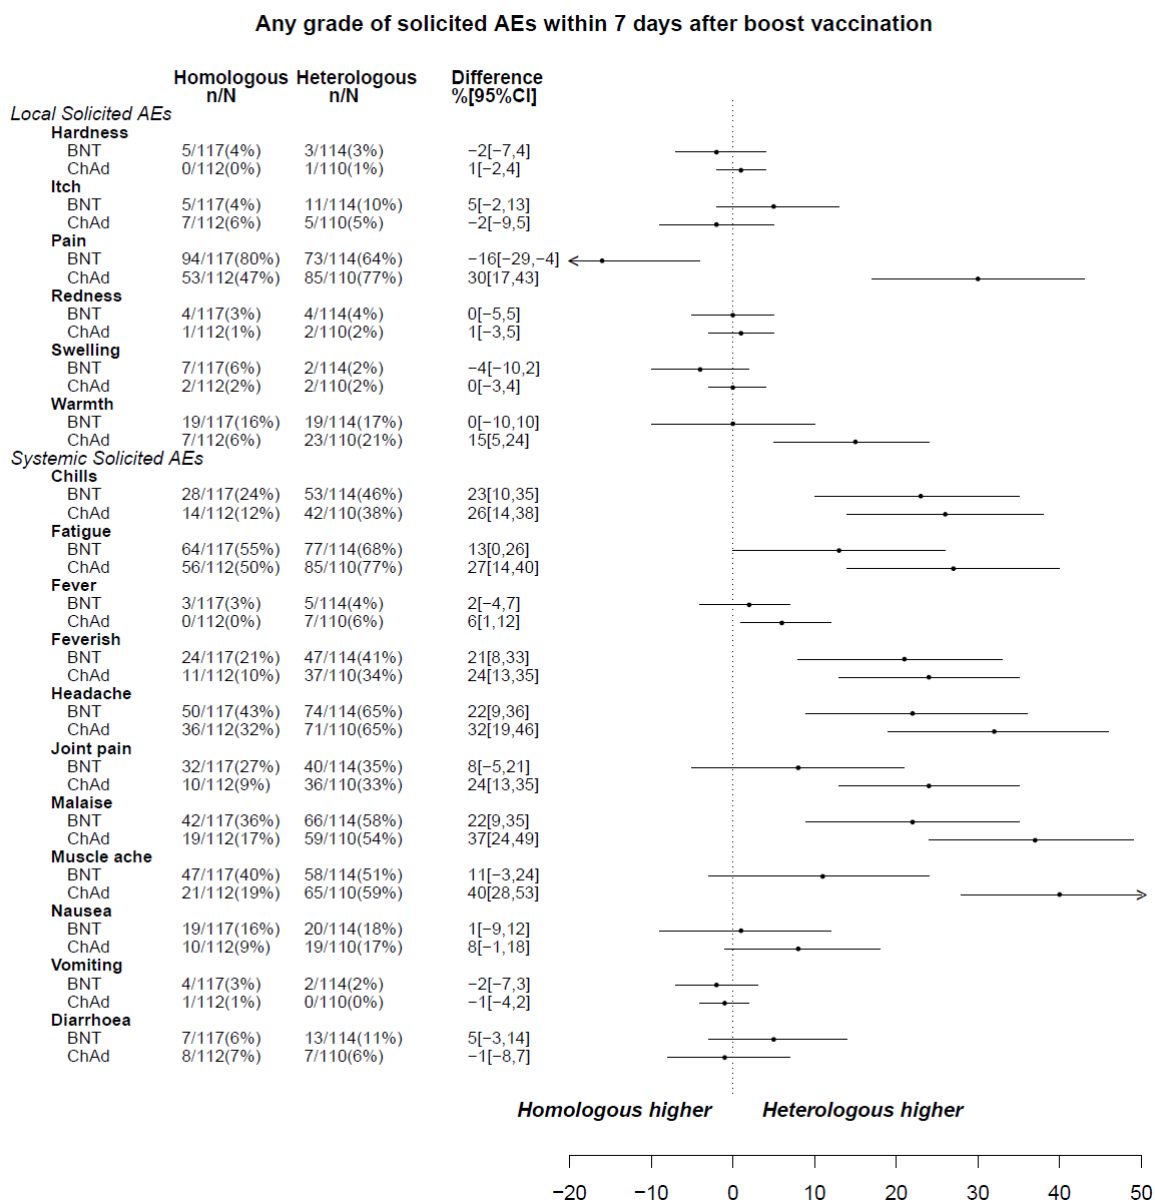

2

3 BNT and ChAd refer to the prime vaccination. Forest plot presents the absolute differences in the

4 proportion of participants with any grade solicited AEs (across 7 days post boost vaccination) with 95%

5 confidence intervals (Yates's correction for continuity) between the heterologous and homologous

6 arms.

7

8

9 *Supplementary Figure 3: Solicited local and systemic reactions across the first 7 days following*  
 10 *vaccination as self-reported in participant electronic diaries by prime/boost vaccination and study arm,*  
 11 *A) local following prime; B) systemic following prime; C) local following boost; D) systemic following*  
 12 *boost.*

13 **A**

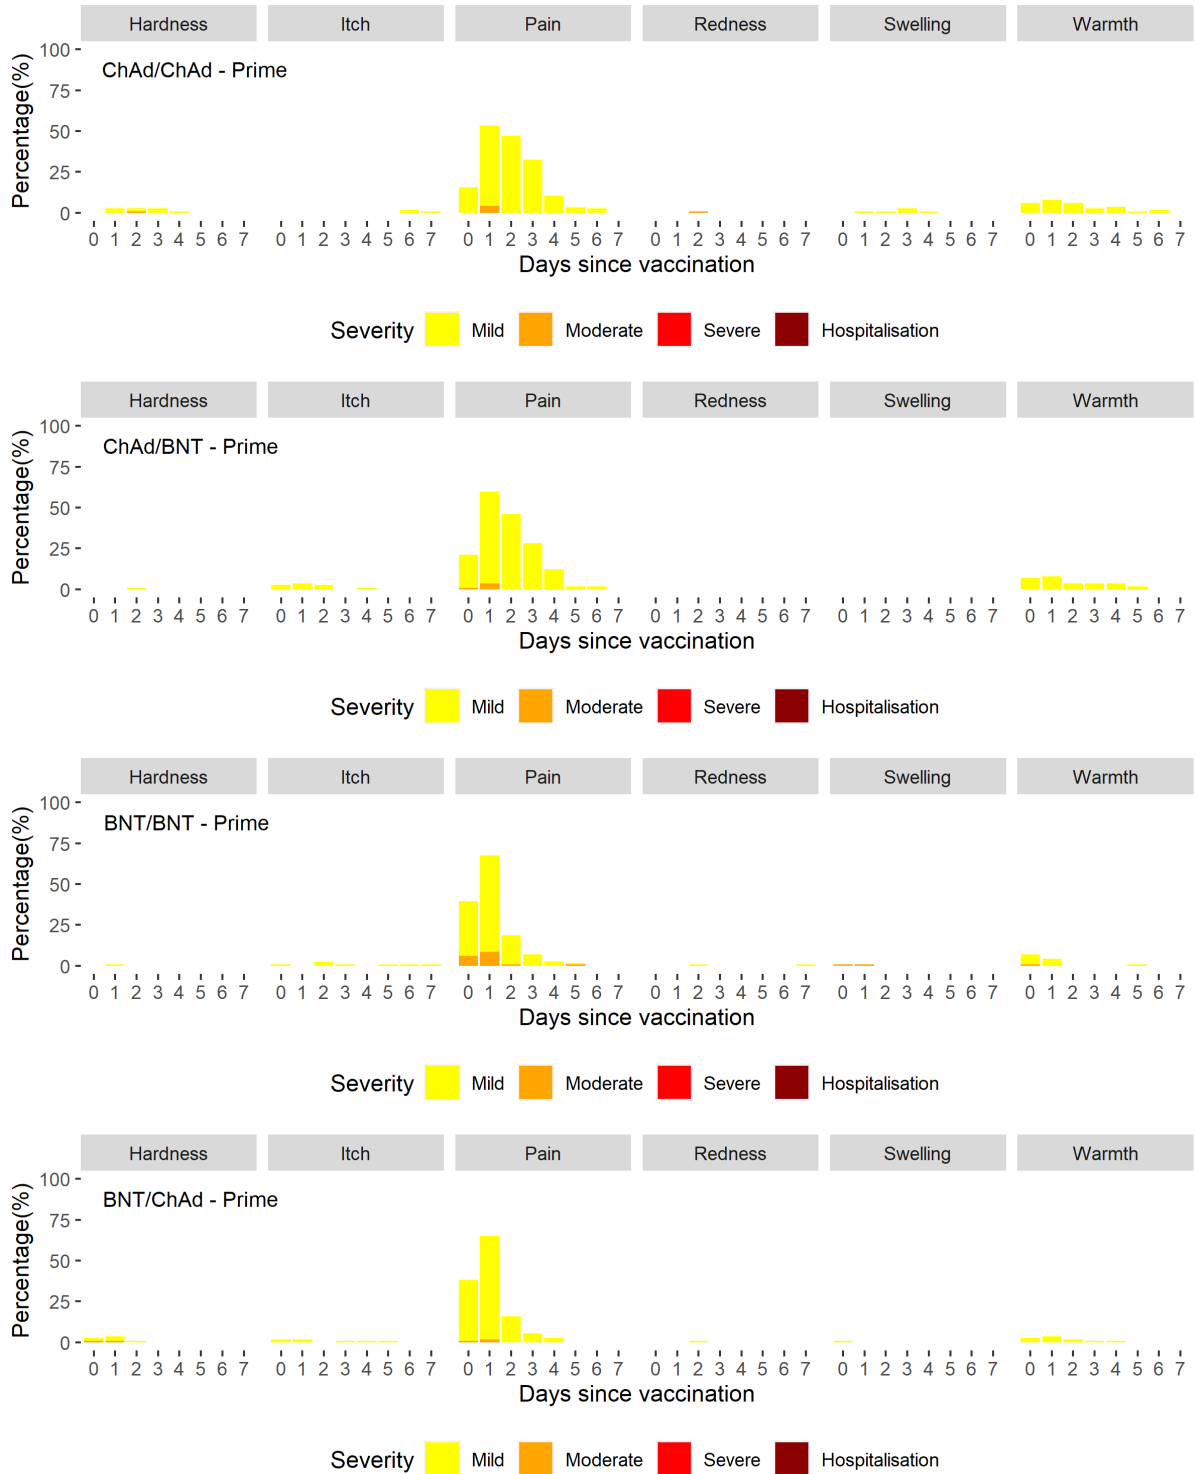

14

15

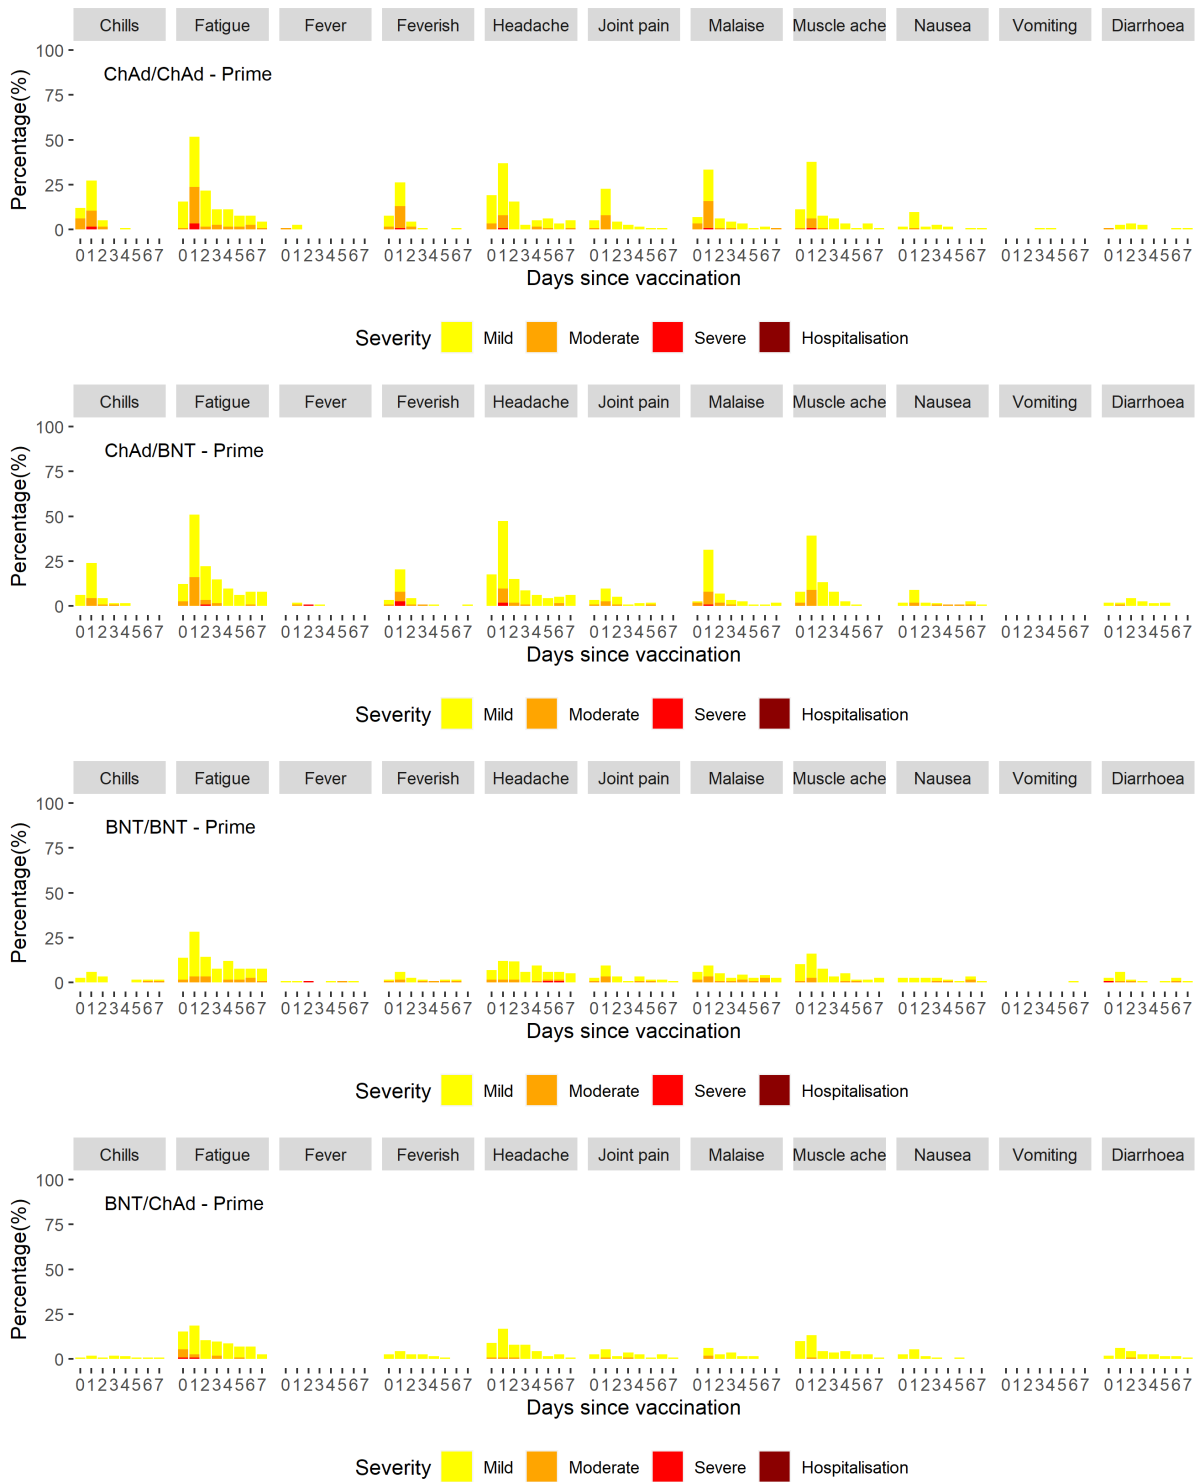

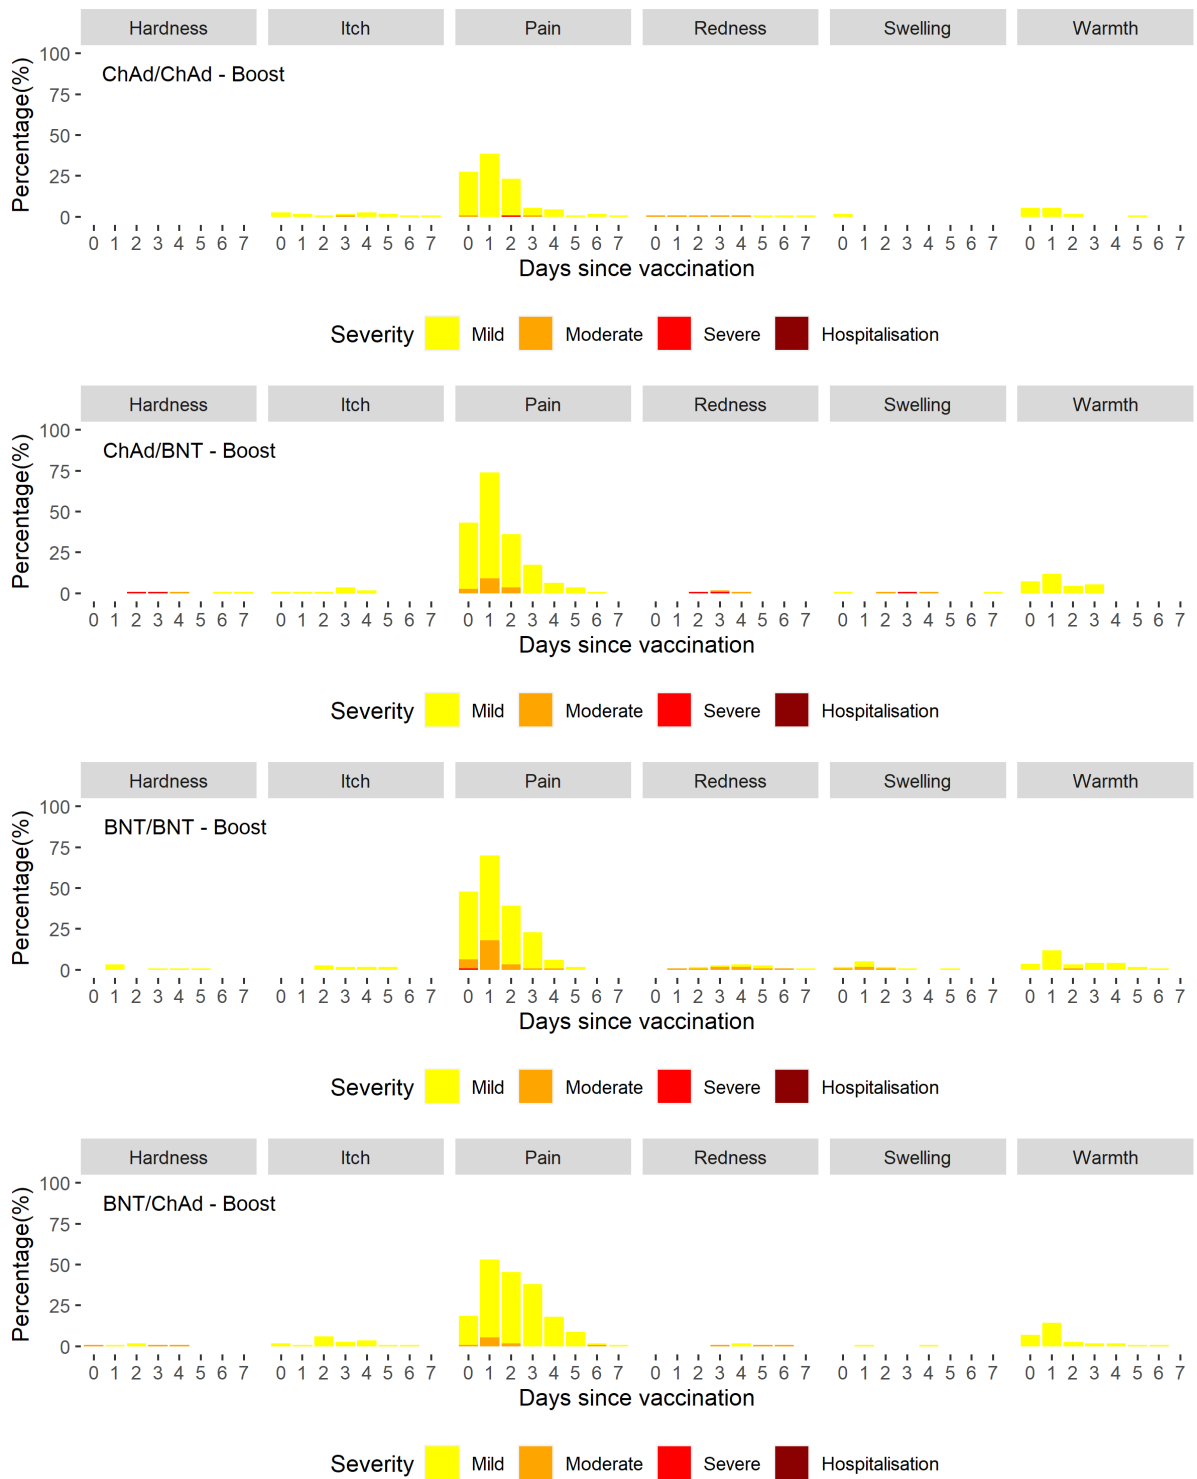

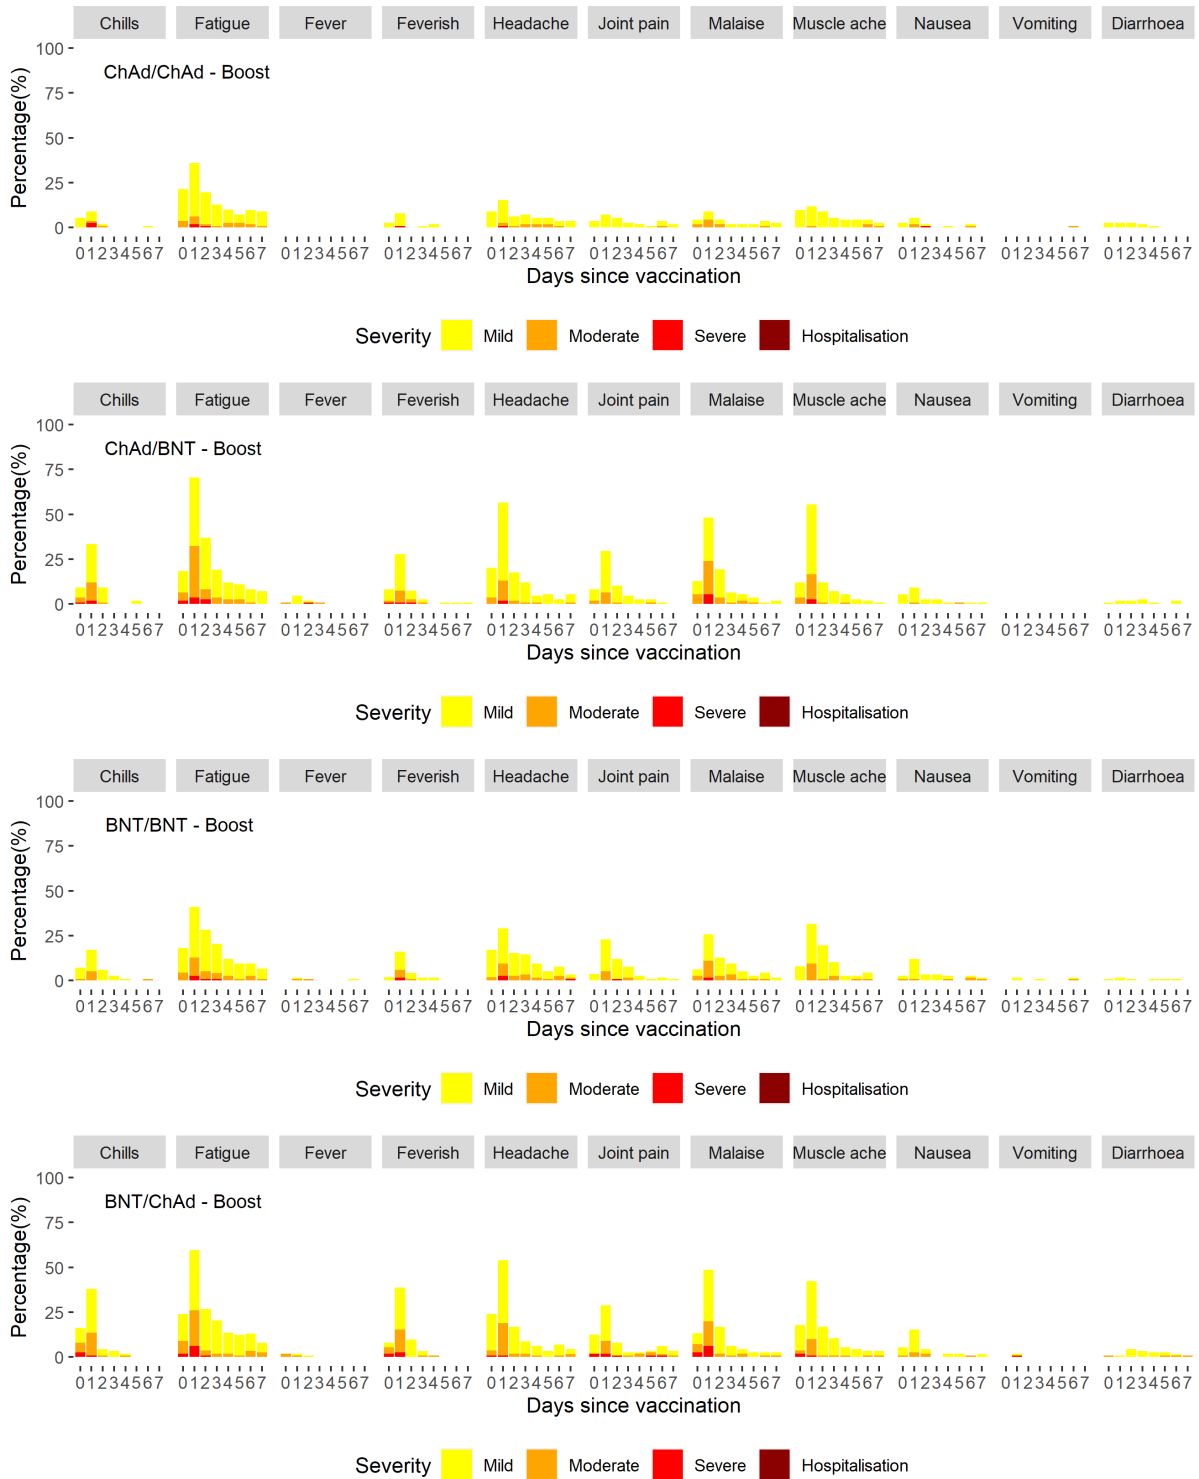

23

24 D0 is the day of prime/boost vaccination. Fever: Mild: 38.0°C to <38.5°C; moderate: 38.5°C to <39°C;  
 25 severe: ≥39.0°C. Feverish: Self-reported feeling of feverishness. For systemic symptoms, grading was classified  
 26 as: Mild – easily tolerated with no limitation on normal activity; Moderate – some limitation of daily activity;  
 27 Severe – unable to perform normal daily activity

28

29 *Supplementary Figure 4: Severity of haematology (A) and biochemistry (B) at day0 (prior to prime*  
 30 *dose), day28 (prior to boost dose), and day 35 (7 days post boost dose) by study arm in the immunology*  
 31 *cohort.*

32 **A**

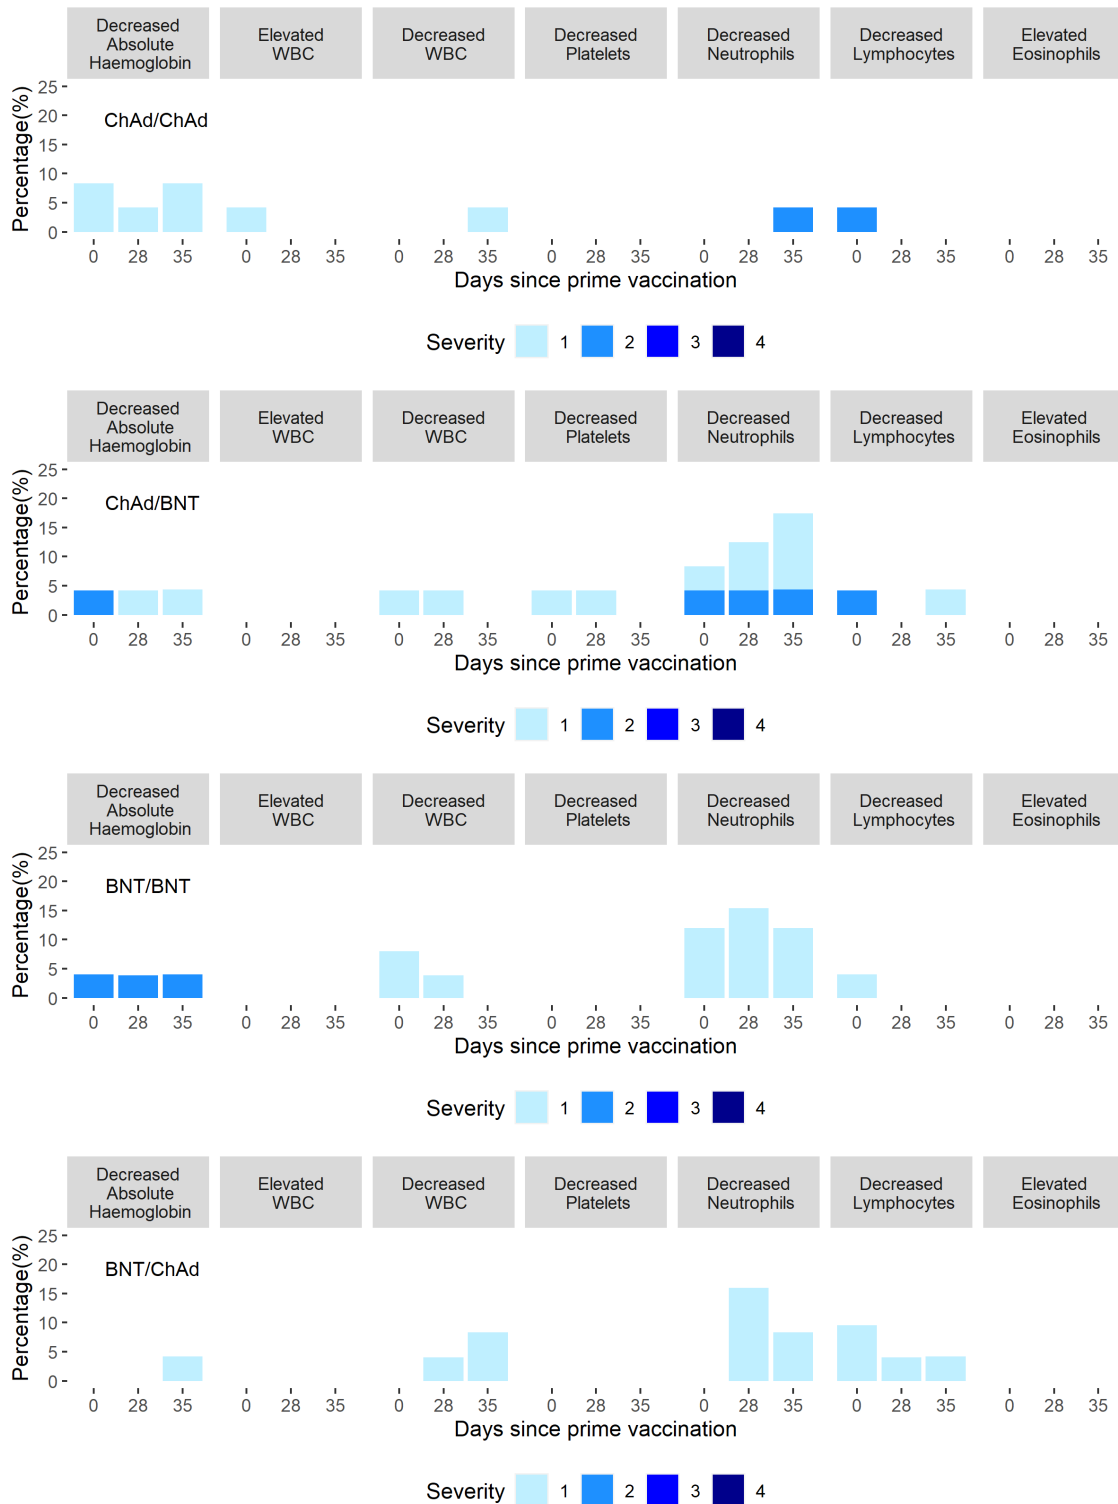

33

34



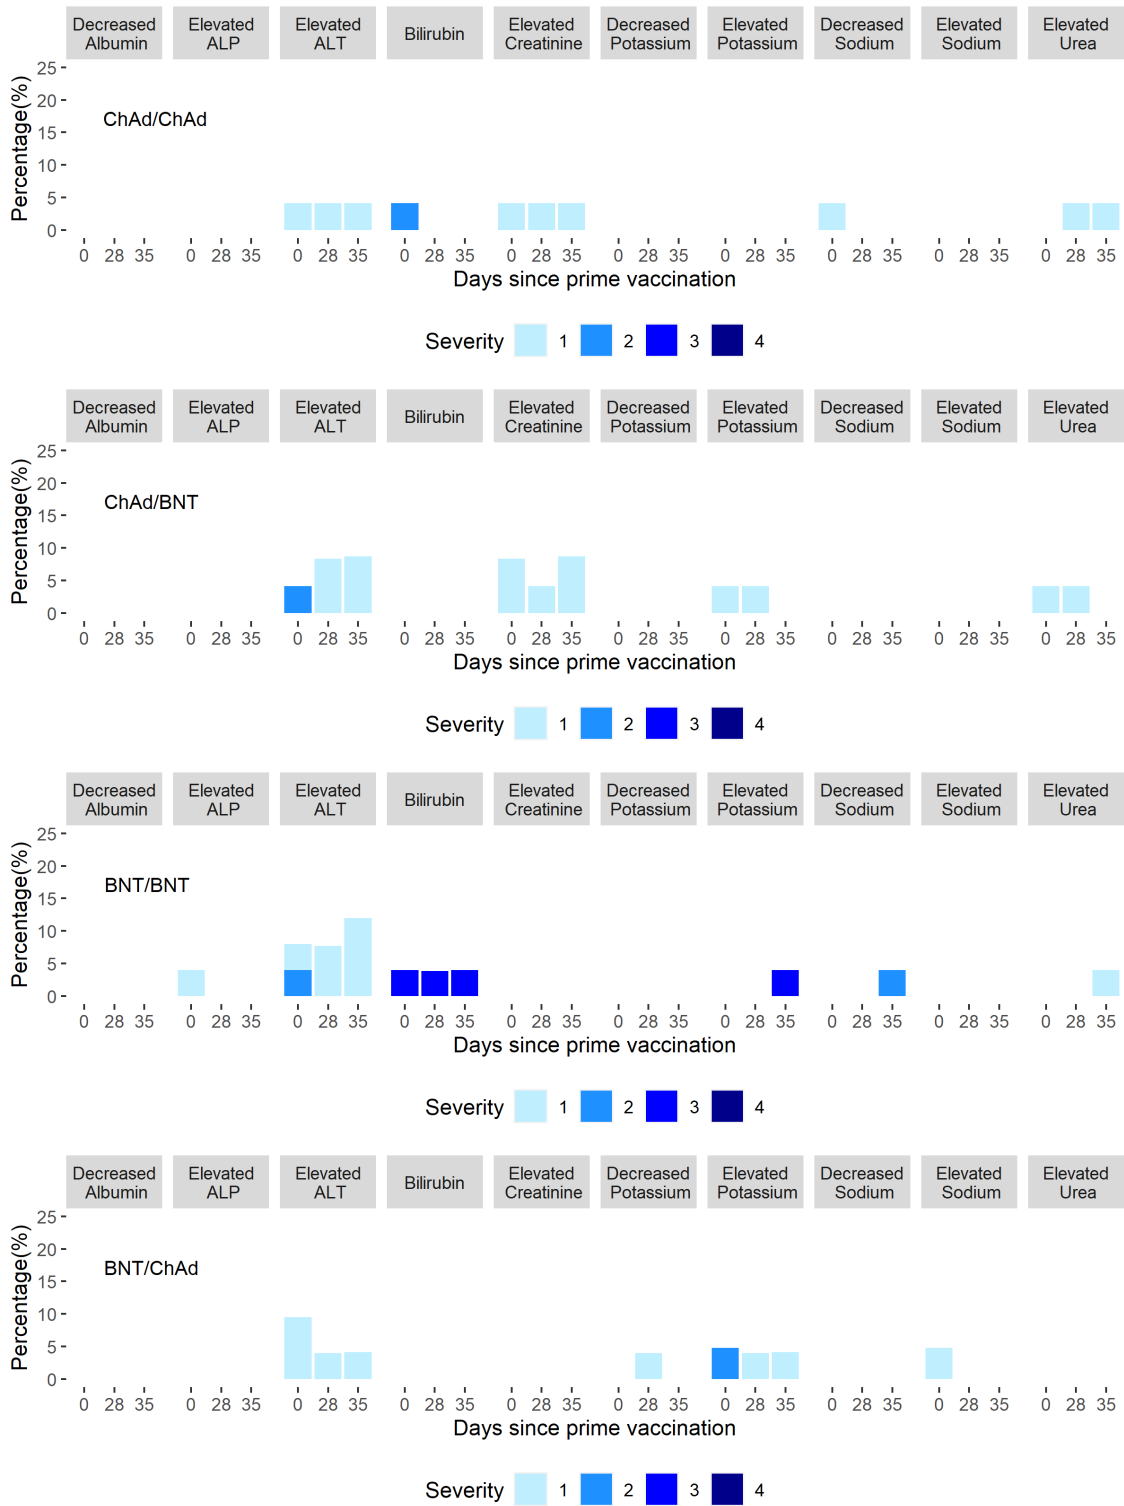

36

37 The details of grading are shown in supplementary table 1.

38

39

40 **Supplementary table 1: Modified FDA toxicity grading table for laboratory adverse events**

|                                  |                           | Units                | Lab range | Grade 1                | Grade 2                 | Grade 3                | Grade 4           |
|----------------------------------|---------------------------|----------------------|-----------|------------------------|-------------------------|------------------------|-------------------|
| <b>Haematology</b>               |                           |                      |           |                        |                         |                        |                   |
| Haemoglobin Absolute             | Male                      | g/l                  | 130-170   | 115-125                | 100-114                 | 85-99                  | <85               |
| Haemoglobin Absolute             | Female                    | g/l                  | 120-150   | 105-113                | 90-104                  | 80-89                  | <80               |
| Haemoglobin change from baseline |                           |                      | n/a       | 10-15                  | 16-20                   | 21-50                  | >50               |
| White Blood Cells                | Elevated                  | x 10 <sup>9</sup> /L | 11.00     | 11.50-15.00            | 15.01-20.00             | 20.01-25.00            | >25.00            |
| White Blood Cells                | Low                       | x 10 <sup>9</sup> /L | 4.00      | 2.50-3.50              | 1.50-2.49               | 1.00-1.49              | <1.00             |
| Platelets                        | Low                       | x 10 <sup>9</sup> /L | 150-400   | 125-140                | 100-124                 | 25-99                  | <25               |
| Neutrophils                      | Low                       | x 10 <sup>9</sup> /L | 2.00-7.00 | 1.50-1.99              | 1.00-1.49               | 0.50-0.99              | <0.50             |
| Lymphocytes                      | Low                       | x 10 <sup>9</sup> /L | 1.00-4.00 | 0.75-0.99              | 0.50-0.74               | 0.25-0.49              | <0.25             |
| Eosinophils                      | Elevated                  | x 10 <sup>9</sup> /L | 0.02-0.50 | 0.65-1.50              | 1.51-5.00               | >5.00                  | Hypereosinophilia |
| <b>Biochemistry</b>              |                           |                      |           |                        |                         |                        |                   |
| Sodium                           | Elevated                  | mmol/L               | 145       | 146-147                | 148-149                 | 150-155                | >155              |
| Sodium                           | Low                       | mmol/L               | 135       | 132-134                | 130-131                 | 125-129                | <125              |
| Potassium                        | Elevated                  | mmol/L               | 5.0       | 5.1-5.2                | 5.3-5.4                 | 5.5-6.5                | >6.5              |
| Potassium                        | Low                       | mmol/L               | 3.5       | 3.2-3.3                | 3.1                     | 2.5-3.0                | <2.5              |
| Urea                             | Elevated                  | mmol/L               | 2.5-7.4   | 8.2-9.3                | 9.4-11.0                | >11.0                  | Requires dialysis |
| Creatinine                       | Elevated                  | µmol/L               | 49-104    | 1.1-1.5xULN<br>114-156 | >1.5-3.0xULN<br>157-312 | >3.0xULN<br>>312       | Requires dialysis |
| Bilirubin                        | Elevated<br>Normal LFTs   | µmol/L               | 0-21      | 1.1-1.5xULN<br>23-32   | >1.5-2xULN<br>33-42     | >2-3xULN<br>43-63      | >3xULN<br>>63     |
| Bilirubin                        | Elevated<br>Abnormal LFTs | µmol/L               | 0-21      | 1.1-1.25xULN<br>23-26  | >1.25-1.5xULN<br>27-32  | >1.5-1.75xULN<br>33-37 | >1.75xULN<br>>37  |
| ALT                              | Elevated                  | IU/L                 | 10-45     | 1.1-2.5xULN<br>49-112  | >2.5-5xULN<br>113-225   | >5-10xULN<br>226-450   | >10xULN<br>>450   |
| ALP (Alkaline phosphatase)       | Elevated                  | IU/L                 | 30-130    | 1.1-2xULN<br>143-260   | >2-3xULN<br>261-390     | >3-10xULN<br>391-1300  | >10xULN<br>>1300  |
| Albumin                          | Low                       | g/L                  | 32-50     | 28-31                  | 25-27                   | <25                    | -                 |
| CRP                              | Elevated                  | mg/L                 | 0-10      | 11-30                  | 31-100                  | 101-200                | >200              |

41

42

43 **Supplementary Author List**

## 44 Com-COV Study Team

|                          |                                                                                                                                                                                                                                   |
|--------------------------|-----------------------------------------------------------------------------------------------------------------------------------------------------------------------------------------------------------------------------------|
| Parvinder Aley           | Oxford Vaccine Group, Department of Paediatrics, University of Oxford, UK                                                                                                                                                         |
| Robert Aley              | Oxford Vaccine Group, Department of Paediatrics, University of Oxford, UK                                                                                                                                                         |
| Nick Andrews             | Public Health England, UK                                                                                                                                                                                                         |
| Claire Cameron           | Public Health Scotland, UK                                                                                                                                                                                                        |
| Elizabeth Clutterbuck    | Oxford Vaccine Group, Department of Paediatrics, University of Oxford, UK                                                                                                                                                         |
| Andrea Collins           | Liverpool School of Tropical Medicine, Liverpool University Hospital Foundation Trusts, UK                                                                                                                                        |
| Claudio di Maso          | Oxford Vaccine Group, Department of Paediatrics, University of Oxford, UK                                                                                                                                                         |
| Tanya Dinesh             | Oxford Vaccine Group, Department of Paediatrics, University of Oxford, UK                                                                                                                                                         |
| Saul N. Faust            | NIHR Southampton Clinical Research Facility and Biomedical Research Centre, University Hospital Southampton NHS Foundation Trust; Faculty of Medicine and Institute for Life Sciences, University of Southampton, Southampton, UK |
| Daniela Ferreira         | Liverpool School of Tropical Medicine , UK                                                                                                                                                                                        |
| Adam Finn                | School of Population Health Sciences, University of Bristol and University Hospitals Bristol and Weston NHS Foundation Trust, UK                                                                                                  |
| Eva Galiza               | Vaccine Institute, St Georges, University of London, UK                                                                                                                                                                           |
| Karishma Gokani          | NIHR/Wellcome Trust Clinical Research Facility, University Hospitals Birmingham NHS Foundation Trust, Birmingham, UK                                                                                                              |
| Christopher Green        | NIHR/Wellcome Trust Clinical Research Facility, University Hospitals Birmingham NHS Foundation Trust, Birmingham, UK                                                                                                              |
| Bassam Hallis            | Public Health England, UK                                                                                                                                                                                                         |
| Paul Heath               | Vaccine Institute, St Georges, University of London, UK                                                                                                                                                                           |
| Helen Hill               | Liverpool School of Tropical Medicine, UK                                                                                                                                                                                         |
| Elizabeth Howe           | Oxford Vaccine Group, Department of Paediatrics, University of Oxford, UK                                                                                                                                                         |
| Johanna Kellelt-Wright   | North Bristol NHS Trust, UK                                                                                                                                                                                                       |
| David Kerr               | Oxford Vaccine Group, Department of Paediatrics, University of Oxford, UK                                                                                                                                                         |
| Teresa Lambe             | Jenner Institute, Nuffield Department of Medicine, University of Oxford, Oxford, UK                                                                                                                                               |
| Rajeka Lazarus           | North Bristol NHS Trust, UK                                                                                                                                                                                                       |
| Vincenzo Libri           | NIHR UCLH Clinical Research Facility and NIHR UCLH Biomedical Research Centre, London, UK                                                                                                                                         |
| Fei Long                 | Oxford Vaccine Group, Department of Paediatrics, University of Oxford, UK                                                                                                                                                         |
| Yama Mujadidi            | Oxford Vaccine Group, Department of Paediatrics, University of Oxford, UK                                                                                                                                                         |
| Alasdair P Munro         | NIHR Southampton Clinical Research Facility and Biomedical Research Centre, University Hospital Southampton NHS Foundation Trust; Faculty of Medicine and Institute for Life Sciences, University of Southampton, Southampton, UK |
| Kush Naker               | NIHR/Wellcome Trust Clinical Research Facility, University Hospitals Birmingham NHS Foundation Trust, Birmingham, UK                                                                                                              |
| Neil Oldfield            | University of Nottingham, UK                                                                                                                                                                                                      |
| Emma Plested             | Oxford Vaccine Group, Department of Paediatrics, University of Oxford, UK                                                                                                                                                         |
| Samuel Provstgaard-Morys | Oxford Vaccine Group, Department of Paediatrics, University of Oxford, UK                                                                                                                                                         |
| Maheshi N Ramasamy       | Oxford Vaccine Group, Department of Paediatrics, University of Oxford, UK                                                                                                                                                         |
| Tommy Rampling           | NIHR UCLH Clinical Research Facility and NIHR UCLH Biomedical Research Centre, London, UK                                                                                                                                         |
| Mary Ramsay              | Public Health England, UK                                                                                                                                                                                                         |

|                             |                                                                                                                                                                                                                                   |
|-----------------------------|-----------------------------------------------------------------------------------------------------------------------------------------------------------------------------------------------------------------------------------|
| Robert C Read               | Faculty of Medicine and Institute for Life Sciences, University of Southampton, and NIHR Southampton Biomedical Research Centre, UK.                                                                                              |
| Tawassal Riaz               | North Bristol NHS Trust                                                                                                                                                                                                           |
| Hannah Robinson             | Oxford Vaccine Group, Department of Paediatrics, University of Oxford, UK                                                                                                                                                         |
| Simon Royal                 | University of Nottingham Health Service, UK                                                                                                                                                                                       |
| Alberto San Francisco Ramos | Vaccine Institute, St Georges, University of London, UK                                                                                                                                                                           |
| Nisha Singh                 | Oxford Vaccine Group, Department of Paediatrics, University of Oxford, UK                                                                                                                                                         |
| David P J Turner            | University of Nottingham and Nottingham University Hospitals NHS Trust, UK                                                                                                                                                        |
| Nicola Turner               | NIHR UCLH Clinical Research Facility and NIHR UCLH Biomedical Research Centre, London, UK                                                                                                                                         |
| Paul J Turner               | National Heart & Lung Institute, Imperial College London, London, UK                                                                                                                                                              |
| Laura Walker                | Oxford Vaccine Group, Department of Paediatrics, University of Oxford, UK                                                                                                                                                         |
| Sarah Warren                | NIHR Southampton Clinical Research Facility and Biomedical Research Centre, University Hospital Southampton NHS Foundation Trust; Faculty of Medicine and Institute for Life Sciences, University of Southampton, Southampton, UK |
| Rachel White                | Oxford Vaccine Group, Department of Paediatrics, University of Oxford, UK                                                                                                                                                         |

45

46
